# Supplementary material for: Calibration of Pathogenicity Due to Variant-Induced Leaky Splicing Defects by Using BRCA2 Exon 3 as a Model System
Source: Oxford University Press journal article supplement (doi:10.1158/0008-5472.can-20-0895), 2020-07-08
Supplement: 00085472can200895-sup-239580_2_supp_6396512_qcsyg7.xlsx [file 00085472can200895-sup-239580_2_supp_6396512_qcsyg7.xlsx]

## Sheet: Supplementary Table S1
Supplementary Table S1. Overview of bioinformatics predictions and experimental data obtained for the 100 BRCA2e3 variants analyzed in this study. * Artificial nucleotide variations not yet reported in human variation databases. a, b and c, RNA from different carriers of BRCA2 c.231G>T (p.=) (P1, P2 and P3, respectively, in Figure 2); d, RNA from a carrier of BRCA2c.231G>T (p.=)(;)c.6515C>A(p.Ser…
BRCA2 variations analyzed in this study				Databases : clinical classifications1															Bioinformatics predictions								RNA splicing assays									Protein functional assay		Suggested classification relative to HBOC	References8
Positions	Nucleotide variations	Predicted protein changes	Selection criteria	COSMIC	ClinVar			dbSNP			ESP	gnomAD	HGMD	BIC	LOVD			BRCA-Share	Splice site-dedicated in silico tools			SRE-dedicated in silico tools					Minigene (monoallelic)2		Patient RNA analysis (biallelic)				HATr mESC (monoallelic)2		Effect on splicing4	Complemen- tation5	Sensitivity to DNA damage agents6
																													LCL2		PAXgene2	ASE 3
																			∆MES	∆SSFL	SPiCE	QUEPASA (-0.5)	HEXplorer (-14)	SPANR (-0.01)	HAL (-3.4)	LRskip (31.1%)	FL level relative to total transcripts (%)	FL level relative to WT on previous column (extrapolated%)	- puromycin	+ puromycin			FL level relative to total transcripts (%)	FL level relative to WT on previous column (extrapolated%)
Controls	Wild-type		-																								99 ± 0.2	100	92 ± 2.3	88 ± 1.9	89 ± 1.1	100	90 ± 0.3	100		Yes	No
	c.157insalu	p.?	-												5			n/a									nd	nd	30 ± 0.1	30 ± 0.1					Drastic effect (Δ3)			5	[22,23]
Intron 2 (n=6)	c.68-7delT	p.?	VUS set (intronic or synonymous variants)	n/a	1		3	n/a			n/a	n/a		3	n/a			1	8.2	0	5						99 ± 0.3	100							No effect			1	[24]
	c.68-7T>A	p.?	Calibration set (intronic or synonymous variants_ss predictions)	n/a	1	2	3	1		2	n/a	n/a		3	1	2	3	3	-24.6	-5.7	58						92 ± 1.1	93	75 ± 0.2 75 ± 0.2 75 ± 0.3 74 ± 0.4	67 ± 0.2 72 ± 0.4 65 ± 0.3 67 ± 0.5					Partial effect (Δ3)	Yes	No	1	[24,25]
	c.68-8_68-7delinsAA	p.?	Calibration set (intronic or synonymous variants_ss predictions)		3													2	-3.3	-12.4	97						55 ± 2.2	56			47 ± 0.9		45 ± 1.1	50	Partial effect (Δ3)	Yes	No	1
	c.68-4A>C*	p.?	Calibration set (intronic or synonymous variants_ss predictions)																-8.2	0	5						100 ± 0.1	101							No effect			1
	c.68-3T>A*	p.?	Calibration set (intronic or synonymous variants_ss predictions)																-42.6	-4.3	75						85 ± 0.6	86							Partial effect (Δ3)			1
	c.68-1G>A*	p.?	Calibration set (intronic or synonymous variants_ss predictions)		4														-100	-100	100						99 ± 1.0	100							Drastic effect (∆3p(6nt))			3
Exon 3 (n=77)	c.69T>C	p.=	Calibration set (intronic or synonymous variants_ss predictions)		2														-11.5	0.0	7						92 ± 0.7	93							Partial effect (Δ3)			1
	c.74G>T	p.Gly25Val	VUS set (missense variants)															3				-1.65	-24.6	-0.79	1	41.0122	88 ± 0.1	89							Partial effect (Δ3)			3
	c.75A>G	p.=	Calibration set (synonymous variants_SRE predictions)	n/a																		-2.23	-44.8	-1.1	-1,1	#VALUE!	67 ± 0.8	68							Partial effect (Δ3)			1
	c.75A>C*	p.=	Calibration set (synonymous variants_SRE predictions)																			-2.35	-35.2	-1.78	-1	54.2863	63 ± 3.4	64							Partial effect (Δ3)			1
	c.75A>T*	p.=	Calibration set (synonymous variants_SRE predictions)																			-2.13	-37.3	-1.42	0.5	50.8513	93 ± 0.8	94							Partial effect (Δ3)			1
	c.78A>C*	p.=	Calibration set (synonymous variants_SRE predictions)																			-0.4	-29.5	-2.66	-2	30.0515	92 ± 0.9	93							Partial effect (Δ3)			1
	c.79A>G	p.Ile27Val	VUS set (missense variants)		3			3				n/a	DM?	3	3			3				-1.04	-5.9	0.16	0	29.6938	94 ± 0.2	95							Partial effect (Δ3)			3	[26]
	c.81A>T*	p.=	Calibration set (synonymous variants_SRE predictions)																			-2.06	-13.8	-0.55	-5.9	47.2424	99 ± 0.1	100							No effect			3
	c.90T>C	p.=	VUS set (intronic or synonymous variants)		2		3	2					n/a		3			2				1.06	48.6	0.22	1.7	7.59753	95 ± 0.3	96							Partial effect (Δ3)			1
	c.92G>C	p.Thr31Ser	VUS set (missense variants)															5				1.6	44.6	0.11	1.9	6.0529	99 ± 0.0	100							No effect			3	[26]
	c.92G>A	p.Trp31*	Control set (nonsense variants)		5			5				n/a	DM		5			5				-1.69	-29.5	-2.5	-5.1	47.1615	57 ± 0.2	58	59 ± 1.9	50 ± 1.7		48 ± 1.1 38± 3.1+p			Partial effect (Δ3)			5	[Z6]
	c.99A>G	p.=	Calibration set (synonymous variants_SRE predictions)	n/a																		-1.71	-56	-0.97	-11.9	56.0531	73 ± 1.7	74							Partial effect (Δ3)			1
	c.100G>A	p.Glu34Lys	VUS set (missense variants)									n/a						3				-3.09	-92.4	-1.46	-27.9	83.9947	86 ± 0.3	87							Partial effect (Δ3 = 14% ; Δ3p(45nt) = 9%)			3	[26]
	c.102A>G	p.=	Calibration set (synonymous variants_SRE predictions)		2			2				n/a						3				-1.61	-19.5	-0.94	-1.4	40.7186	51 ± 1.4	52			45 ± 1.3	54 ± 1.9	44 ± 0.9	49	Partial effect (Δ3)	Yes	No	1
	c.107C>T	p.Ser36Phe	VUS set (missense variants)					3				n/a	DM?					3				-2.36	-140	-1.46	-71	93.3977	79 ± 0.3	80							Partial effect (Δ3)			3
	c.114A>G	p.=	Calibration set (synonymous variants_SRE predictions)		2													2				-1.37	-81.3	-0.89	-6	54.328	97 ± 0.2	98							No effect			1
	c.117T>C*	p.=	Calibration set (synonymous variants_SRE predictions)																			-0.71	-65.9	-0.28	-12.8	45.3878	92 ± 2.8	93							Partial effect (Δ3)			1
	c.120A>C*	p.=	Calibration set (synonymous variants_SRE predictions)																			-0.61	-52.9	-1	-12.4	41.4654	73 ± 3.1	74							Partial effect (Δ3)			1
	c.120A>T*	p.=	Calibration set (synonymous variants_SRE predictions)																			0.26	-50.6	-0.99	-2.6	26.3344	96 ± 0.5	97							No effect			1
	c.121C>T	p.Pro41Ser	VUS set (missense variants)		3			3				n/a		3				3				0.92	14.8	-0.13	1.2	11.0168	99 ± 0.3	100							No effect			3	[26]
	c.122C>T	p.Pro41Ser	VUS set (missense variants)	n/a	1	2	3	1		3		n/a	DM		3			3				0.28	-4	-0.28	0.2	17.4293	99 ± 0.1	100							No effect			3
	c.135A>G*	p.=	Calibration set (synonymous variants_SRE predictions)																			-1.46	-43.3	-0.2	0.2	42.8376	97 ± 0.4	98							No effect			1
	c.139G>T	p.Ala47Ser	VUS set (missense variants)															3				-1.57	-46.7	-0.53	-1.4	46.1273	91 ± 0.7	92							Partial effect (Δ3)			3
	c.140C>T	p.Ala47Val	VUS set (missense variants)															3				-3.34	-112.4	-0.7	-48.7	91.6676	92 ± 0.3	93							Partial effect (Δ3)			3	[26]
	c.142G>A	p.Gly48Lys	VUS set (missense variants)		3													3				-2.74	-72.6	-2	-25.1	77.6927	92 ± 0.4	93							Partial effect (Δ3)			3
	c.143A>G	p.Glu48Gly	VUS set (missense variants)															3				-2.64	-57.4	-1.7	-20.1	71.8605	93 ± 0.2	94							Partial effect (Δ3)			3	[26]
	c.144A>G	p.=	Calibration set (synonymous variants_SRE predictions)																			-2.17	-68.5	-1.08	-5	61.1503	93 ± 0.3	94							Partial effect (Δ3)			1
	c.145G>T	p.Glu49*	Control set (nonsense variants)		5			4		5		n/a	DM	5	5			5				-3.69	-144.7	-2.55	-60	96.0085	62 ± 0.1	63	61 ± 1.1	53 ± 0.9		50 ± 1.2 54± 7.8+p			Partial effect (Δ3)			5	[27]
	c.147A>G*	p.=	Calibration set (synonymous variants_SRE predictions)																			-1.03	-29.7	-1.72	-1	36.2103	94 ± 0.2	95							No effect			1
	c.150T>C	p.=	VUS set (intronic or synonymous variants)															3				0.39	17.1	0.32	1.4	13.5465	99 ± 0.1	100							No effect			1
	c.162C>T*	p.=	Calibration set (synonymous variants_SRE predictions)																			-1.53	-120.1	-2.32	-23.8	73.9764	84 ± 1.2	85							Partial effect (Δ3)			1
	c.165C>T	p.=	Calibration set (synonymous variants_SRE predictions)		2			4														-1.88	-103.2	-0.82	-19.2	71.5871	85 ± 1.6	86					79 ± 0.2	88	Partial effect (Δ3)	Yes	No	1
	c.167A>C	p.Asn56Thr	VUS set (missense variants)		1		2	1		2		n/a		3	1			1				0.19	-15.6	-0.14	0.6	19.5685	99 ± 0.3	100							No effect			3
	c.171C>T	p.=	VUS set (intronic or synonymous variants)		2		3	2	3	5		n/a						3				-1.23	-24.8	-0.8	-2.6	37.7105	92 ± 0.8	93							Partial effect (Δ3)			1
	c.175C>G	p.Pro59ala	VUS set (missense variants)		1	2	3	1		3	n/a	n/a		3	3			3				0.37	9.6	-0.09	1.6	14.6173	100 ± 0.0	101							No effect			3
	c.177A>C	p.=	VUS set (intronic or synonymous variants)															3				-1.03	-8.2	-0.27	0.2	30.2203	100 ± 0.1	101							No effect			1
	c.177A>T*	p.=	Calibration set (synonymous variants_SRE predictions)																			-1.32	-50.7	-0.96	-3.5	45.2797	98 ± 0.2	99							No effect			1
	c.179A>G	p.Asn60Ser	VUS set (missense variants)		2		3	2				n/a		3	3			3				-0.67	13.9	-0.07	1.4	22.0689	99 ± 0.2	100							No effect			3
	c.180C>T	p.=	VUS set (intronic or synonymous variants)		2							n/a			3			2				-0.33	-27.9	-0.14	-0.9	26.9594	96 ± 0.3	97							No effect			1
	c.183A>G	p.=	VUS set (intronic or synonymous variants)		2		3					n/a						3				2.15	25.7	1.58	1	5.33081	98 ± 0.5	99							No effect			1
	c.191C>T	p.Thr64Ile	VUS set (missense variants)		3			3				n/a	DM?					3				-0.89	-41.3	-0.76	-8.8	40.3151	99 ± 0.5	100							No effect			3
	c.192T>C*	p.=	Calibration set (synonymous variants_SRE predictions)																			-1.04	-32.4	-0.05	-15	42.9005	89 ± 1.4	90							Partial effect (Δ3)			1
	c.195A>C	p.=	Calibration set (synonymous variants_SRE predictions)		2																	-1.4	-48.8	-0.28	-12.3	50.0708	82 ± 1.7	83							Partial effect (Δ3)			1
	c.198A>G	p.=	VUS set (intronic or synonymous variants)	n/a	1		2	1		2	n/a	n/a	DM?	3	1		3	2				-0.1	9.1	0.85	0.6	17.8935	99 ± 0.1	100							No effect			1
	c.207A>C*	p.=	Calibration set (synonymous variants_SRE predictions)																			-0.24	-45.8	-0.35	-11.7	34.5727	88 ± 1.1	89							Partial effect (Δ3)			1
	c.220C>T*	p.=	Calibration set (synonymous variants_SRE predictions)																			-0.31	-62	-0.34	-18.9	42.6537	90 ± 0.2	91							Partial effect (Δ3)			1
	c.222G>A	p.=	Calibration set (synonymous variants_SRE predictions)		2							n/a	DM?		3							-2.73	-48.3	-1.23	-28.8	74.4989	68 ± 2.1	69							Partial effect (Δ3)			1	[26]
	c.222G>T*	p.=	Calibration set (synonymous variants_SRE predictions)																			-1.14	-67.2	-0.49	-23.9	57.3289	97 ± 0.1	98							No effect			1
	c.223G>C	p.Ala75Pro	VUS set (missense variants)		1	2	3	1		2	n/a	n/a	DM?	3	1		3	1				0.31	-3.3	-0.73	0.3	17.2787	99 ± 0.1	100	91 ± 0.2	87 ± 0.6		96 ± 2.1			No effect			3	[24]
	c.228A>C*	p.=	Calibration set (synonymous variants_SRE predictions)																			-1.06	-40.8	-0.47	-6.7	41.0283	66 ± 0.4	67							Partial effect (Δ3)			1
	c. 231T>G	p.=	VUS set (intronic or synonymous variants)		1		2	1			n/a	n/a			1		3	3				1.65	27.2	0.71	1.7	6.78693	69 ± 3.4	70	62 ± 1.8a 56 ± 1.2b 55 ± 1.1c 48 ± 0.4d	60 ± 1.0a 54 ± 0.9b 53 ± 1.0c 47 ± 0.7d		65 ± 1.1a 62 ± 1.3b 56 ± 0.9c 108 ± 2.1d	61 ± 1.1	68	Partial effect (Δ3)	Yes	No	1	[24]
	c.231T>C	p.=	Calibration set (synonymous variants_SRE predictions)															3				-1.51	-21.2	0.23	-6.8	41.7927	77 ± 0.7	78							Partial effect (Δ3)			1
	c.237A>C	p.=	VUS set (intronic or synonymous variants)															3				2.09	55.6	0.31	1.3	4.34273	99 ± 0.2	100							No effect			1
	c.240A>G	p.Ile80Met	VUS set (missense variants)		3			3						3				3				1.26	36	0.35	0.9	7.78889	99 ± 0.3	100							No effect			3
	c.241T>A	p.Phe81Ile	VUS set (missense variants)		2		3	2		3		n/a	DM?	3	3			3				0.07	12.1	-0.08	1.2	16.4616	99 ± 0.3	100							No effect			3
	c.243C>T	p.=	Calibration set (synonymous variants_SRE predictions)		2										2							-2.54	-131.1	-1.96	-12.6	80.5291	96 ± 0.3	97							No effect			1
	c.252A>G*	p.=	Calibration set (synonymous variants_SRE predictions)																			-1.28	-58	-0.69	-8.7	49.0373	92 ± 0.9	93							Partial effect (Δ3)			1
	c.256C>T	p.=	Calibration set (synonymous variants_SRE predictions)		2																	-1.32	-28.8	-0.25	-30.9	54.3322	68 ± 1.2	69							Partial effect (Δ3)			1
	c.258G>A*	p.=	Calibration set (synonymous variants_SRE predictions)																			-2.43	-18.3	-1.17	-28.8	65.357	92 ± 0.3	93							Partial effect (Δ3)			1
	c.258G>T*	p.=	Calibration set (synonymous variants_SRE predictions)																			-2	-24.6	-0.95	-20.3	56.9776	91 ± 0.4	92							Partial effect (Δ3)			1
	c.258G>C*	p.=	Calibration set (synonymous variants_SRE predictions)																			-2.14	-20.1	-1.39	-2.8	48.7218	98 ± 0.0	99							No effect			1
	c.260C>G	p.Thr87Ser	VUS set (missense variants)															3				-1.04	-10.4	-0.63	-1.5	31.7868	97 ± 0.2	98							No effect			3
	c.264G>A*	p.=	Calibration set (synonymous variants_SRE predictions)																			-1.36	27.9	-0.59	-0.9	27.5114	92 ± 0.1	93							Partial effect (Δ3)			1
	c.266C>T	p.Pro89Leu	VUS set (missense variants)	n/a	3			n/a				n/a	DM?		3			3				0.01	19.2	-0.19	1.5	15.9434	97 ± 0.3	98							No effect			3
	c.267G>C*	p.=	Calibration set (synonymous variants_SRE predictions)																			-1.62	-77.7	-1.47	-65.6	82.759	83 ± 1.2	84							Partial effect (Δ3)			1
	c.267G>T	p.=	Calibration set (synonymous variants_SRE predictions)		2			1		2		n/a										-0.69	-81.9	-1.42	-14.2	50.4682	94 ± 0.7	95							Partial effect (Δ3)			1
	c.267G>A	p.=	Calibration set (synonymous variants_SRE predictions)		1	2	3	1		2		n/a			3			3				-1.46	-29.8	-1.24	-5.1	43.3228	96 ± 0.2	97							No effect			1
	c.270G>T*	p.=	Calibration set (synonymous variants_SRE predictions)																			-1.75	-34.8	-0.94	-7.4	49.2179	99 ± 0	100							No effect			1
	c.270G>A*	p.=	Calibration set (synonymous variants_SRE predictions)																			-1.75	-34.8	-0.94	-7.4	49.2179	92 ± 0.7	93							Partial effect (Δ3)			1
	c.279T>C*	p.=	Calibration set (synonymous variants_SRE predictions)																			-1.21	-21.2	-0.07	-59.4	65.7671	83 ± 0.5	84							Partial effect (Δ3)			1
	c.280C>T	p.Pro94Ser	VUS set (missense variants)		2		3	2		3		n/a		3	3			3				0.1	-25.2	0.24	-2.5	22.7547	97 ± 0.7	98							No effect			3
	c.291A>G*	p.=	Calibration set (synonymous variants_SRE predictions)																			-1.42	-8.7	-0.15	-3.5	36.4959	88 ± 2.1	89							Partial effect (Δ3)			1
	c.303C>T	p.=	Calibration set (synonymous variants_SRE predictions)		2			3							2							-2.15	-125.5	-1.62	-15.7	77.23	94 ± 0.2	95							Partial effect (Δ3)			1
	c.305A>T	p.Lys102Ile	VUS set (missense variants)															3				-0.61	-37.1	-1.16	-2.7	33.2756	98 ± 0.3	99							No effect			3
	c.315_316+3delinsGGGTG*	p.=	Calibration set (intronic or synonymous variants_ss predictions)																-10.3	-14.0	100						93 ± 0.9	94							Partial effect (Δ3)			3
	c.315_316+4delinsGGGTAC*	p.=	Calibration set (intronic or synonymous variants_ss predictions)																-20.6	-20.6	100						37 ± 3.1	37							Partial effect (Δ3)			1
	c.316G>C	p.Gly106Arg	VUS set (missense variants)															3	-20.6	-20.6	78						58 ± 1.2	59	56 ± 1.1	48 ± 1.1		39 ± 1.4			Partial effect (Δ3)			3
	c.316G>A	p.Gly106Arg	VUS set (missense variants)		3							n/a							-16.5	-12.7	87						34 ± 0.2	34	39 ± 0.5e 39 ± 0.5f	36 ± 0.7e 39 ± 0.5f		24 ± 0.5e 22 ± 0.9f	25 ± 0.6	28	Partial effect (Δ3)	Poor	Yes	3
Intron 3 (n=16)	c.316+1G>A	p.?	Calibration set (intronic or synonymous variants_ss predictions)		5														-100	-100	100						0 ± 0.0	0							Drastic effect (Δ3)			5
	c.316+1G>C	p.?	Calibration set (intronic or synonymous variants_ss predictions)		5														-100	-59.4	100						0 ± 0.0	0							Drastic effect (Δ3)			5
	c.316+1G>T	p.?	Calibration set (intronic or synonymous variants_ss predictions)	n/a	4		5												-100	-49.7	100						0 ± 0.0	0							Drastic effect (Δ3)			5	[22]
	c.316+2T>C	p.?	Calibration set (intronic or synonymous variants_ss predictions)		5									3				5	-100	-0.6	99						4 ± 0.2	4							Drastic effect (Δ3)			5	[22,26]
	c.316+3A>C	p.?	Calibration set (intronic or synonymous variants_ss predictions)															3	-34.0	-10.3	91						3 ± 0.9	3							Drastic effect (Δ3)			5
	c.316+4delA	p.?	Calibration set (intronic or synonymous variants_ss predictions)		n/a													5	-69.1	-29.0	100						0 ± 0.0	0							Drastic effect (Δ3)			5	[22,26]
	c.316+4A>C*	p.?	Calibration set (intronic or synonymous variants_ss predictions)																-15.5	-11.3	80						34 ± 3.2	34							Partial effect (Δ3)			3
	c.316+4_316+6delinsCGA*	p.?	Calibration set (intronic or synonymous variants_ss predictions)																-26.8	-16.8	98						5 ± 1.2	5							Drastic effect (Δ3)			5
	c.316+5G>A	p.?	Calibration set (intronic or synonymous variants_ss predictions)		4		5											5	-32.0	-12.7	96						5 ± 0.3	5							Drastic effect (Δ3)			5	[22,28]
	c.316+5G>C	p.?	Calibration set (intronic or synonymous variants_ss predictions)		5													5	-34.0	-13.2	97						5 ± 1.6	5							Drastic effect (Δ3)	No	n/a	5	[22,29,26]
	c.316+6T>A*	p.?	Calibration set (intronic or synonymous variants_ss predictions)																-6.2	-5.6	21						26 ± 0.4	26					15 ± 1.4	17	Partial effect (Δ3)	Poor	Yes	3
	c.316+6T>C	p.?	Calibration set (intronic or synonymous variants_ss predictions)		3							n/a		3				5	-8.2	-6.0	25						35 ± 2.3	35	38 ± 2.1	40 ± 1.9			24 ± 0.2	27	Partial effect (Δ3)	Yes	No	1	[26]
	c.316+6T>G	p.?	Calibration set (intronic or synonymous variants_ss predictions)									n/a							-4.1	-5.2	14						23 ± 2.1	23					11 ± 1.1	12	Partial effect (Δ3)	Poor	Yes	3
	c.316+12A>G	p.?	VUS set (intronic or synonymous variants)		1		2	1				1						3	0	0	n/a						99 ± 0.1	100							No effect			1
	c.316+13A>G	p.?	VUS set (intronic or synonymous variants)		2		3											3	0	0	n/a						99 ± 0.1	100							No effect			1
	c.316+40C>G	p.?	VUS set (intronic or synonymous variants)															3	0	0	n/a						99 ± 0.1	100							No effect			1

## Sheet: Supplementary Table S2
Supplementary Table S2. Description of primers used in this study 1 F, forward; R, reverse. 2 Intronic and exonic sequences are indicated in grey and black, respectively. The position of the nucleotide variant is underlined. The double underlined sequences correspond to restriction sites for BamHI and MluI and the sequence highlighted in grey correspond to the 15 bp-tail used for homologous recom…
Purpose		Name1	Sequence2
Splicing reporter minigene-based assay	Site-directed mutagenesis	Br2Ex3_c.68-4AC-R	CCTAAATCTAGTTAAAAAAAAAATC
		Br2Ex3_c.68-3TA-F	TTTTTTTTTAAAAAGATTTAGGACC
		Br2Ex3_c.68-1GA-F	TTTTAAATAAATTTAGGACCAATAAG
		Br2Ex3_c.69TC-F	TTTTAAATAGACTTAGGACCAATAAG
		Br2Ex3_73GA-F	AATAGATTTAAGACCAATAAGTC
		Br2Ex3_75AC-F	AATAGATTTAGGCCCAATAAGTC
		Br2Ex3_75AG-R	GACTTATTGGCCCTAAATCTATT
		Br2Ex3_75AT-R	GACTTATTGGACCTAAATCTATT
		Br2Ex3_78AC-F	GATTTAGGACCCATAAGTCTTAA
		Br2Ex3_81AT-F	AGGACCAATTAGTCTTAATTGG
		Br2Ex3_90TC-F	ATAAGTCTTAACTGGTTTGAAGA
		Br2Ex3_91TC-R	GTTCTTCAAACCGATTAAGACTTATTG
		Br2Ex3_93GT-R	GAAAGTTCTTCAAAACAATTAAGAC
		Br2Ex3_99AG-F	AATTGGTTTGAGGAACTTTCTTC
		Br2Ex3_100GA-F	AATTGGTTTGAAAAACTTTCTTCAG
		Br2Ex3_100GT-R	CTGAAGAAAGTTATTCAAACCAATT
		Br2Ex3_102AG-R	CTTCTGAAGAAAGCTCTTCAAACC
		Br2Ex3_107CT-R	AGCTTCTGAAAAAAGTTCTTC
		Br2Ex3_114AG-F	CTTTCTTCAGAGGCTCCACCCTA
		Br2Ex3_117TC-R	ATTATAGGGTGGGGCTTCTGAAG
		Br2Ex3_120AC-F	TCAGAAGCTCCCCCCTATAATTC
		Br2Ex3_120AT-R	GAATTATAGGGAGGAGCTTCTGA
		Br2Ex3_135AG-F	CTATAATTCTGAGCCTGCAGAAG
		Br2Ex3_144AG-R	TGTTCAGATTCCTCTGCAGGTTC
		Br2Ex3_147AG-F	CCTGCAGAAGAGTCTGAACATA
		Br2Ex3_162CT-R	TCGTAATTGTTATTTTTATGTTC
		Br2Ex3_165CT-F	CATAAAAACAATAATTACGAACC
		Br2Ex3_171CT-F	AACAACAATTATGAACCAAACCT
		Br2Ex3_177AT-R	AATTACGAACCCAACCTATTTAAAAC
		Br2Ex3_180CT-R	TAAATAGGTTAGGTTCGTAATTG
		Br2Ex3_192TC-F	ATTTAAAACCCCACAAAGGAAAC
		Br2Ex3_195AC-R	GATGGTTTCCTTTGGGGAGTTTTA
		Br2Ex3_207AC-F	CAAAGGAAACCCTCTTATAATCAG
		Br2Ex3_220CT-R	GAGTTGAAGCCAACTGATTATAAG
		Br2Ex3_222GA-F	CTTATAATCAGCTAGCTTCAACTC
		Br2Ex3_222GT-R	GAGTTGAAGCAAGCTGATTATAAG
		Br2Ex3_228AC-R	ATTATTGGAGTGGAAGCCAGCTG
		Br2Ex3_231TC-F	GGCTTCAACCCCAATAATATTC
		Br2Ex3_243CT-R	CCTTGCTCTTTAAATATTATTGG
		Br2Ex3_252AG-F	TCAAAGAGCAGGGGCTGACTCTG
		Br2Ex3_256CT-R	GCAGAGTCAACCCTTGCTCTTTG
		Br2Ex3_258GA-F	GAGCAAGGGCTAACTCTGCCGCTGTAC
		Br2Ex3_258GC-F	GAGCAAGGGCTCACTCTGCCGCTGTAC
		Br2Ex3_258GT-R	GTACAGCGGCAGAGTAAGCCCTTGCTC
		Br2Ex3_264GA-R	GATTGGTACAGCGGTAGAGTCAGC
		Br2Ex3_267GA-F	CTGACTCTGCCAACTGTACCAATC
		Br2Ex3_267GC-F	CTGACTCTGCCCCTGTACCAATC
		Br2Ex3_267GT-R	GATTGGTACAGAGGCAGAGTCAG
		Br2Ex3_270GA-F	ACTCTGCCGCTATACCAATCTCC
		Br2Ex3_270GT-R	GAGATTGGTAAAGCGGCAGAGTC
		Br2Ex3_279TC-F	GCTGTACCAATCCCCTGTAAAAG
		Br2Ex3_291AG-R	GAATTTATCTAACTCTTTTACAGG
		Br2Ex3_303CT-R	CTAAGTCTAATTTAAATTTATCT
		Br2Ex3_315_316+3delinsGGGTG-F	CAAATTAGACTTGGGTGAGTAATGCA
		Br2Ex3_315_316+4delinsGGGTAC	GCATTACGTACCCAAGTCTAATTTG
		Br2Ex3_316+1GA-F	CAAATTAGACTTAGATAAGTAATGC
		Br2Ex3_316+1GC	GCATTACTTAGCTAAGTCTAATTTG
		Br2Ex3_316+1GT-F	CAAATTAGACTTAGTTAAGTAATGC
		Br2Ex3_316+3AC	GCATTACTGACCTAAGTCTAATTTG
		Br2Ex3_316+4AC-F	CAAATTAGACTTAGGTACGTAATGC
		Br2Ex3_316+4_316+6delinsCGA-R	GCATTTCGTACCTAAGTCTAATTTG
		Br2Ex3_316+6TC-R	CTACCATATTGCATTGCTTACCTAAGTC
		Br2Ex3_316+6TA-F	GACTTAGGTAAGAAATGCAATATGGTAG
	PCR (cloning, minigene preparation)	Br2Ex3_InFus_BamHI-F	AGGCTAAGAAGTGCAGGATCTGTTATACCTTTGCCCTGAGATTTAC
		Br2Ex3_InFus_MluI-R	AGGGGTCAAAACAAGACGCGTTGCTTGACACCACTGGACTA
	Sequencing of minigene inserts	pCAS-Seq-F	GGGGTCAATAGCAGTGAGAG
		pCAS-Seq-R	GCTCCATTTCACAGGTAGAGA
	RT-PCR and sequencing of RT-PCR products	6FAM-pCAS-KO1-F (5’-fluo)	TGACGTCGCCGCCCATCAC
		pCAS-2R	ATTGGTTGTTGAGTTGGTTGTC
Allele specific expression (SNaPshot®)	Primer extension	Br2Ex3_c.92GA-F	ATTTAGGACCAATAAGTCTTAATT
		Br2Ex3_c.92GA-R	GAGCTTCTGAAGAAAGTTCTTCAAAC
		Br2Ex3_c.102AG-F	GGACCAATAAGTCTTAATTGGTTTGAAGA
		Br2Ex3_c.102AG-R	TTATAGGGTGGAGCTTCTGAAGAAAG
		Br2Ex3_c.145GT-F	CCCTATAATTCTGAACCTGCAGAA
		Br2Ex3_c.145GT-R	GTTCGTAATTGTTGTTTTTATGTTCAGATT
		Br2Ex3_c.223GC-F	CAAAGGAAACCATCTTATAATCAGCTG
		Br2Ex3_c.223GC-R	TTGCTCTTTGAATATTATTGGAGTTGAAG
		Br2Ex3_c.231TG-F	CCATCTTATAATCAGCTGGCTTCAAC
		Br2Ex3_c.231TG-R	CAGCCCTTGCTCTTTGAATATTATTGG
		Br2Ex3_c.289GT-F	CGCTGTACCAATCTCCTGTAAAA
		Br2Ex3_c.289GT-R	CTAAGTCTAATTTGAATTTATCTAATT
		Br2Ex3_c.316G-F	CCTGTAAAAGAATTAGATAAATTCAAATTAGACTTA
	RT-PCR on patient RNA	Br2Ex2_F	ATGCCTATTGGATCCAAAGAGAGGCC
		Br2Ex5_R	CTGACTTATCTCTTTGTGGTGTTACATG
	PCR on genomic DNA	Br2Ex3_InFus_BamHI-F	AGGCTAAGAAGTGCAGGATCCTTCGCAAGAGAATGGATTAATGATC
		Br2Ex3_InFus_MluI-R	AGGGGTCAAAACAAGACGCGTGGAGGGATGAAAGAGAACATTTAC
	RT-PCR on blood-derived patient RNA	Br2Ex2_F	ATGCCTATTGGATCCAAAGAGAGGCC
		Br2Ex5_R	CTGACTTATCTCTTTGTGGTGTTACATG
Mouse embryonnic stelm cell-based assay	galK-based recombneering to generate point mutations in BAC	BRCA2Ex3_GalK_P1-F	GATTCGCAAGAGAATGGATTAATGATCTTGTTTAATTAATATGCCTTAACAAAAGTAATCCATAGTCAAGCCTGTTGACAATTAATCATCGGCA
		BRCA2Ex3_GalK_P1-R	CATCGTCTCCATTTTTCGAGTGAGGAAAAAGAGGCCAGAGAGACTGATTTGCCCAGCATGACACAATTAATCAGCACTGTCCTGCTCCTT
		BRCA2 Ex3_P2-F	GATTCGCAAGAGAATGGATTAATGATC
		BRCA2 Ex3_P2-R	CATCGTCTCCATTTTTCGAGTGAG
	RT-PCR on RNA to check for BRCA2 expression in G418r cells	B2ex11FRT	CCAAGTCATGCCACACATTC
		B2ex14RRT	ATTCTTGACCAGGTGCGGTA
	RT-PCR on RNA to quantify splicing defects in HATr cells	Br2Ex2_F	ATGCCTATTGGATCCAAAGAGAGGCC
		Br2Ex5_R	CTGACTTATCTCTTTGTGGTGTTACATG

## Sheet: Supplementary Table S3
Supplementary Table S3. Comparison of experimental results obtained with pCAS2-BRCA2e3 minigenes carrying nucleotide variants mapping to BRCA2 e3 splice sites or to flanking intronic positions with in silico data obtained with splice site-dedicated bioinformatics approaches. The impact on splicing of 24 variants located in or near the splice sites of BRCA2 exon 3, as indicated, was determined by …
Variations BRCA2 exon 3 (n=27)	Effect on splicing	Exon 3 inclusion (%)	∆MES (-15%)	∆SSFL (-5%)	∆MES+∆SSFL	SPiCE (11.5%)
WT	-	99	0	0	0	0
c.68-7T>A	↑ Skipping	92	-24.6	-5.7	2/2	58
c.68-8_68-7delinsAA	↑ Skipping	55	-3.3	-12.4	1/2	97
c.68-3T>A	↑ Skipping	85	-42.6	-4.3	1/2	75
c.68-1G>A*	Δ3p(6nt)	1	-100	-100	2/2	100
c.69T>C	↑ Skipping	92	-11.5	0	2/2	7
c.315_316+3delinsGGGTG	↑ Skipping	93	-10.3	-14	1/2	100
c.315_316+4delinsGGGTAC	↑ Skipping	37	-20.6	-20.6	2/2	100
c.316G>A	↑ Skipping	34	-16.5	-12.7	2/2	87
c.316G>C	↑ Skipping	58	-4.1	-13.9	1/2	78
c.316+1G>A	↑ Skipping	0	-100	-100	2/2	100
c.316+1G>C	↑ Skipping	0	-100	-59.4	2/2	100
c.316+1G>T	↑ Skipping	0	-100	-49.7	2/2	100
c.316+2T>C	↑ Skipping	4	-100	-0.6	1/2	99
c.316+3A>C	↑ Skipping	3	-34	-10.3	2/2	91
c.316+4delA	↑ Skipping	0	-69.1	-29	2/2	100
c.316+4A>C	↑ Skipping	34	-15.5	-11.3	2/2	80
c.316+4_316+6delinsCGA	↑ Skipping	5	-26.8	-16.8	2/2	98
c.316+5G>A	↑ Skipping	5	-32	-12.7	2/2	96
c.316+5G>C	↑ Skipping	5	-34	-13.2	2/2	97
c.316+6T>A	↑ Skipping	26	-6.2	-5.6	1/2	21
c.316+6T>C	↑ Skipping	35	-8.2	-6	1/2	25
c.316+6T>G	↑ Skipping	23	-4.1	-5.2	1/2	14
c.68-7delT	No effect	99	8.2	0	2/2	5
c.68-4A>C	No effect	100	-8.2	0	2/2	5
True calls		Positive	15	19	13	21
		Negative	2	2	2	2
		Total	17	21	15	23
False calls		Positive	0	0	0	0
		Negative	7	3	9	1
		Total	24	24	24	1
Sensitivity			68	86	59	95
Specificity			100	100	100	100
Accuracy			71	88	63	96

## Sheet: Supplementary Table S4
Supplementary Table S4. Comparison of the experimental results obtained with pCAS2-BRCA2e3 minigenes carrying natural BRCA2 exon 3 variants with in silico data obtained with SRE-dedicated bioinformatics approaches. The impact on splicing of 74 BRCA2 exon 3 variants, as indicated, was determined by performing a cell-based splicing assay with pCAS2-BRCA2e3 minigenes. Here, the table shows a separat…
Variations BRCA2 exon 3 (n=70)	Effect on splicing	Exon 3 inclusion (%)	QUEPASA (-0,5)	HEXplorer (-14)	SPANR (-0,1%)	HAL (-3,4%)	LRskip (31,1%)	QUEPASA &HAL	AT LEAST 3
WT	-	99	0	0	0	0	0	n/a	n/a
c.74G>T	↑ Skipping	88	-1.65	-24.6	-0.79	1	41.0122	0.5	0.75
c.75A>G	↑ Skipping	67	-2.23	-44.8	-1.1	-1.1	54.5007	0.5	0.75
c.75A>C	↑ Skipping	63	-2.35	-35.2	-1.78	-1	54.2863	0.5	0.75
c.75A>T	↑ Skipping	93	-2.13	-37.3	-1.42	0.5	50.8513	0.5	0.75
c.78A>C	↑ Skipping	92	-0.4	-29.5	-2.66	-2	30.0515	0/2	0.5
c.79A>G	↑ Skipping	94	-1.04	-5.9	0.16	0	29.6938	0.5	0.25
c.90T>C	↑ Skipping	95	1.06	48.6	0.22	1.7	7.59753	0/2	0/4
c.92G>A	↑ Skipping	57	-1.69	-29.5	-2.5	-5.1	47.1615	1/1	1/1
c.99A>G	↑ Skipping	73	-1.71	-56	-0.97	-11.9	56.0531	1/1	1/1
c.100G>A*	↑ Skipping Δ3p(45nt)	77	-3.09	-92.4	-1.46	-27.9	83.9947	0.5	1/1
c.102A>G	↑ Skipping	51	-1.61	-19.5	-0.94	-1.4	40.7186	0.5	0.75
c.107C>T	↑ Skipping	79	-2.36	-140	-1.46	-71	93.3977	1/1	1/1
c.117T>C	↑ Skipping	92	-0.71	-65.9	-0.28	-12.8	45.3878	1/1	1/1
c.120A>C	↑ Skipping	73	-0.61	-52.9	-1	-12.4	41.4654	1/1	1/1
c.139G>T	↑ Skipping	91	-1.57	-46.7	-0.53	-1.4	46.1273	0.5	0.75
c.140C>T	↑ Skipping	92	-3.34	-112.4	-0.7	-48.7	91.6676	1/1	1/1
c.142G>A	↑ Skipping	92	-2.74	-72.6	-2	-25.1	77.6927	1/1	1/1
c.143A>G	↑ Skipping	93	-2.64	-57.4	-1.7	-20.1	71.8605	1/1	1/1
c.144A>G	↑ Skipping	93	-2.17	-68.5	-1.08	-5	61.1503	1/1	1/1
c.145G>T	↑ Skipping	62	-3.69	-144.7	-2.55	-60	96.0085	1/1	1/1
c.162C>T	↑ Skipping	84	-1.53	-120.1	-2.32	-23.8	73.9764	1/1	1/1
c.165C>T	↑ Skipping	85	-1.88	-103.2	-0.82	-19.2	71.5871	1/1	1/1
c.171C>T	↑ Skipping	92	-1.23	-24.8	-0.8	-2.6	37.7105	0.5	0.75
c.192T>C	↑ Skipping	89	-1.04	-32.4	-0.05	-15	42.9005	1/1	0.75
c.195A>C	↑ Skipping	82	-1.4	-48.8	-0.28	-12.3	50.0708	1/1	1/1
c.207A>C	↑ Skipping	88	-0.24	-45.8	-0.35	-11.7	34.5727	0.5	0.75
c.220C>T	↑ Skipping	90	-0.31	-62	-0.34	-18.9	42.6537	0.5	0.75
c.222G>A	↑ Skipping	68	-2.73	-48.3	-1.23	-28.8	74.4989	1/1	1/1
c.228A>C	↑ Skipping	76	-1.06	-40.8	-0.47	-6.7	41.0283	1/1	1/1
c.231T>G	↑ Skipping	69	1.65	27.2	0.71	1.7	6.78693	0/2	0/4
c.231T>C	↑ Skipping	77	-1.51	-21.2	0.23	-6.8	41.7927	1/1	0.25
c.252A>G	↑ Skipping	92	-1.28	-58	-0.69	-8.7	49.0373	1/1	1/1
c.256C>T	↑ Skipping	68	-1.32	-28.8	-0.25	-30.9	54.3322	1/1	1/1
c.258G>A	↑ Skipping	92	-2.43	-18.3	-1.17	-28.8	65.357	1/1	1/1
c.258G>T	↑ Skipping	91	-2	-24.6	-0.95	-20.3	56.9776	1/1	1/1
c.264G>A	↑ Skipping	92	-1.36	27.9	-0.59	-0.9	27.5114	0.5	0.5
c.267G>C	↑ Skipping	83	-1.62	-77.7	-1.47	-65.6	82.759	1/1	1/1
c.267G>T	↑ Skipping	94	-0.69	-81.9	-1.42	-14.2	50.4682	1/1	1/1
c.270G>A	↑ Skipping	92	-1.75	-34.8	-0.94	-7.4	49.2179	1/1	1/1
c.279T>C	↑ Skipping	83	-1.21	-21.2	-0.07	-59.4	65.7671	1/1	0.75
c.289G>T	↑ Skipping	nd*	-2.53	-149.5	-1.23	-38.2	89.227	1/1	1/1
c.291A>G	↑ Skipping	88	-1.42	-8.7	-0.15	-3.5	36.4959	1/1	0.75
c.303C>T	↑ Skipping	94	-2.15	-125.5	-1.62	-15.7	77.23	1/1	1/1
c.81A>T	No effect	99	-2.06	-13.8	-0.55	-5.9	47.2424	1/1	0.75
c.92G>C	No effect	99	1.6	44.6	0.11	1.9	6.0529	0/2	0/4
c.114A>G	No effect	97	-1.37	-81.3	-0.89	-6	54.328	1/1	1/1
c.120A>T	No effect	96	0.26	-50.6	-0.99	-2.6	26.3344	0/2	0.5
c.121C>T	No effect	99	0.92	14.8	-0.13	1.2	11.0168	0/2	0.25
c.122C>T	No effect	99	0.28	-4	-0.28	0.2	17.4293	0/2	0.25
c.135A>G	No effect	97	-1.46	-43.3	-0.2	0.2	42.8376	0.5	0.75
c.147A>G	No effect	96	-1.03	-29.7	-1.72	-1	36.2103	0.5	0.75
c.150T>C	No effect	99	0.39	17.1	0.32	1.4	13.5465	0/2	0/4
c.167A>C	No effect	99	0.19	-15.6	-0.14	0.6	19.5685	0/2	0.5
c.175C>G	No effect	100	0.37	9.6	-0.09	1.6	14.6173	0/2	0/4
c.177A>C	No effect	100	-1.03	-8.2	-0.27	0.2	30.2203	0.5	0.5
c.177A>T	No effect	98	-1.32	-50.7	-0.96	-3.5	45.2797	1/1	1/1
c.179A>G	No effect	99	-0.67	13.9	-0.07	1.4	22.0689	0.5	0.25
c.180C>T	No effect	96	-0.33	-27.9	-0.14	-0.9	26.9594	0/2	0.5
c.183A>G	No effect	98	2.15	25.7	1.58	1	5.33081	0/2	0/4
c.191C>T	No effect	99	-0.89	-41.3	-0.76	-8.8	40.3151	1/1	1/1
c.198A>G	No effect	99	-0.1	9.1	0.85	0.6	17.8935	0/2	0/4
c.222G>T	No effect	97	-1.14	-67.2	-0.49	-23.9	57.3289	1/1	1/1
c.223G>C	No effect	99	0.31	-3.3	-0.73	0.3	17.2787	0/2	0.25
c.237A>C	No effect	99	2.09	55.6	0.31	1.3	4.34273	0/2	0/4
c.240A>G	No effect	99	1.26	36	0.35	0.9	7.78889	0/2	0/4
c.241T>A	No effect	99	0.07	12.1	-0.08	1.2	16.4616	0/2	0/4
c.243C>T	No effect	96	-2.54	-131.1	-1.96	-12.6	80.5291	1/1	1/1
c.258G>C	No effect	98	-2.14	-20.1	-1.39	-2.8	48.7218	0.5	0.5
c.260C>G	No effect	97	-1.04	-10.4	-0.63	-1.5	31.7868	0.5	0.5
c.266C>T	No effect	97	0.01	19.2	-0.19	1.5	15.9434	0/2	0.25
c.267G>A	No effect	96	-1.46	-29.8	-1.24	-5.1	43.3228	1/1	1/1
c.270G>T	No effect	99	-1.75	-34.8	-0.94	-7.4	49.2179	1/1	1/1
c.280C>T	No effect	97	0.1	-25.2	0.24	-2.5	22.7547	0/2	0.25
c.305A>T	No effect	98	-0.61	-37.1	-1.16	-2.7	33.2756	0.5	0.75
True calls		Positives	38	38	37	31	38	28	38
		Negatives	16	17	10	23	19	25	20
		Total	54	55	47	54	57	53	58
False calls		Positives	15	14	21	8	12	6	11
		Negatives	5	5	6	12	5	15	5
		Total	20	19	27	20	17	21	16
Sensitivity			88	88	86	78	88	65	88
Specificity			52	55	32	74	61	81	65
Accuracy			73	74	64	73	77	72	78

## Sheet: Supplementary Table S5
Supplementary Table S5. Statistical analyses conducted in this study. Data derived from confrontation of experimental and in silico analyses were compared by using either Student’s test and Pearson’s correlation or their derivatives depending on the purpose of the analysis and data distribution patterns, as indicated. MES, MaxEntScan; SSFL, Splice Site Finder-Like.
Purpose	Gaussian distribution (Shapiro Wilk test)	Statistical analysis	Bioinformatics approach
Linear correlation between exon inclusion levels and in silico predictions	No	Spearman	QUEPASA, HEXplorer, SPANR
	Yes	Pearson	MES, SSFL, SPiCE HAL, LRskip
Discrimination of 2 groups of variants (variants that increase exon skipping and those that do not)	Yes	Student	QUEPASA, HEXplorer, SPANR
	Yes	Student with Welsh's correction
	No	Mann-Whiteny	MES, SSFL, SPiCE HAL, LRskip

## Sheet: Supplementary Table S6
Supplementary Table S6. Summary of biological, clinical, tumoral, familial and multifactorial data obtained for BRCA2 spliceogenic variants analyzed in the mESC complementation assay and suggested clinical classifications. *, artificial variant (absent from Human variation databases); FL, BRCA2 transcripts containing full-length exon 3; Δ3, BRCA2 transcripts lacking exon 3; aFamilial data and can…
		mECS complementation assay		Minigene assay	Carriers' RNA			Proband information				Family information			Multifactorial analysis (pathogenicity probability scores)						Variant classification
BRCA2 variant	Predicted aminoacid change	Cell survival	Exon 3 inclusion level relative to WT (extrapolated % FL, Supplementary Table S1)	Exon 3 inclusion level relative to WT (extrapolated % FL, Supplementary Table S1)	Confirmation of splicing defects in human samples (relative increase in Δ3 as compared to healthy controls, Supplementary Table S1)	Maximum allele frequency according to gnomAD (%)	Number of families (French GGC network)	Family	Co-occuring BRCA2 variants	Clinical data (age at diagnosis)	Tumoral data	Affected relative	Cancer typea (age at diagnosis)	BRCA2 genotype	Prior	LR Hist Fam	LR Coseg	LR Path	LR Causality	Posterior Probability	Previous (BRCA-Share database)	This study (multifactorial analysis and/or population data)	This study (mESC functional assay)
c.68-8_68-7delinsAA	(p.?)	YES	50	56	YES	n.a.	6	A1	None	BC (57y)	RH-, HER2-	Brother	MelC, (57y)	n.d.	0.5	0.95882	0.2012	1.1066	0.21347	0.175919	Class 3 (VUS)	Class 3 (VUS)	Class 1 (Neutral)
								A2	None	OC (75y)		Mother	CC (80y)	n.d.
								A3	None	BC (36y)	Grade II, RH-, HER2-	-	-
								A4	None	BC (61y)		Mother	BC (53y)	n.d.
												Paternal aunt 1	BC (90y)	n.d.
												Paternal aunt 2	BC (50y)	n.d.
												Paternal cousin (F)	BC (60y)	n.d.
												Paternal cousin	ProC (60y)	n.d.
								A5	None	BC (66y)	Grade II	Paternal cousin (F)	BC (40y)	n.d.
												Paternal grandmother	BC (50y)	n.d.
												Niece 1	BC (30y)	n.d.
												Niece 2	OC (35y)	n.d.
												Niece 3	BC (51y)	n.d.
												Niece 4	BC (32y)	n.d.
								A6	c.7007+34A>G (neutral)	BC (48y)	Grade I, RH+, HER2-	Sister	BC (44y and 55y)	[-]
									c.*32G>A (VUS)			Mother	BC (64y)	n.d.
												Paternel cousin (F)	OC (53y)	[-]
												Paternel cousin (M)	ProC (60y)	n.d.
												Maternal grand-cousin (F)	BC (55y)	n.d.
c.102A>G	p.=	YES	49	52	YES	0.0009	2	B1	None	BC (69y)	Grade III, RH+	Sister 1	BC (58y)	c.102A>G	0.03	0.38647	1.8276	1.76	1.2431	0.037	Class 3 (VUS)	Class 3 (VUS)	Class 1 (Neutral)
												Brother	PanC (44y)	n.d.
												Paternal aunt 1	BC (60-65y)	n.d.
								B2	None	PanC (59y)	-	Mother	BC (77y)	n.d.
												Maternal uncle	ProC (73y)	n.d.
												Maternal cousin (F)	BC (48y)	n.d.
												Paternel cousin (F)	BC (~60y)	n.d.
c.165C>T	p.=	YES	88	86	Samples not available	0.0029	none														n.a.	Class 3 (VUS)	Class 1 (Neutral)
c.231T>G	p.=	YES	68	70	YES	0.66 (including an homozygous individual)	51		These families Include 2 probands with co-occuring BRCA2 truncating mutations (either c.6373_6374delinsG, or c.6515C>A, both not known if in cis or in trans)												Class 3 (VUS)	Class 1 (Neutral)	Class 1 (Neutral)
c.316G>A (maternal allele)	p.(Gly106Arg)	Poor	28	34	YES	0.0029	1	D1	c.2806_2809delAAAC (in trans, paternal allele)	FA (dead 5y)		Maternal aunt	BC (29y)	n.d.	0.29	0.094	1.7196	-	0.16184	0.06201	Class 3 (VUS)	Class 3 (VUS)	Class 3 (VUS)
												Maternal grand-aunt	BC (?y)	n.d.
c.316+6T>A*	(p.?)	Poor	17	26	Not applicable*	n.a.	none*														n.a.	Class 3 (VUS)	Class 3 (VUS)
c.316+6T>C	(p.?)	YES	27	35	YES	0.0009	1	E1	-	OC (60y)		Sister	CC (57y)	n.d.	0.04	0.24	-	-	2.8235	0.105263	Class 3 (VUS)	Class 3 (VUS)	Class 1 (Neutral)
												Father	ProC (78y)	n.d.
												Paternal aunt	BC (75y)	n.d.
												Paternal cousin (F)	BC (55y)	n.d.
												Paternal niece	BC (48y)	n.d.
												Maternal aunt	BC (72y)	n.d.
												Maternal niece	BC (36y)	n.d.
c.316+6T>G	(p.?)	Poor	12	23	Samples not available	0.0065	none														n.a.	Class 3 (VUS)	Class 3 (VUS)
